# Supplementary material
Source: Springer Nature journal article supplement (https://www.springermedizin.de/resource/supplementary/12884_2010_334_MOESM5_ESM.pdf/9457468)

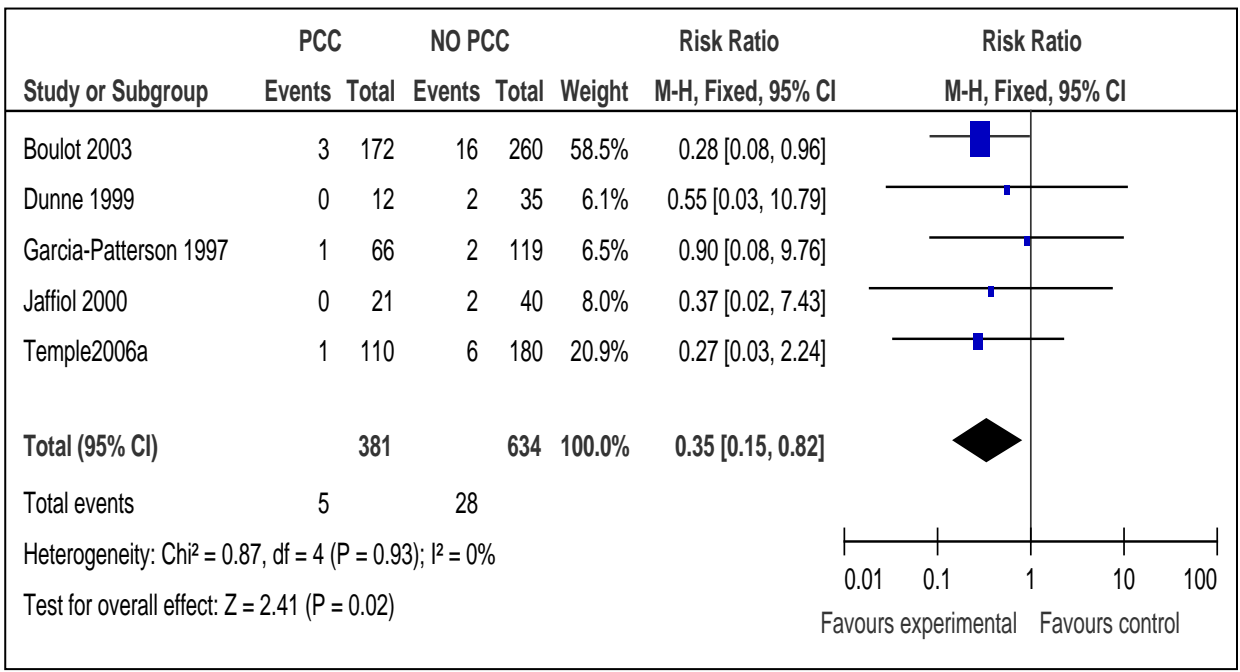

Supplement: MOESM5 [file 9457468]
